# Supplementary material
Source: PubMed Central journal article supplement (PMC7523229)
Supplement: NIHMS1627669-supplement-1.pdf [file NIHMS1627669-supplement-1.pdf]

**SUPPLEMENTAL FIGURE S1**  
**Interrupted time-series for postoperative radiotherapy pattern**

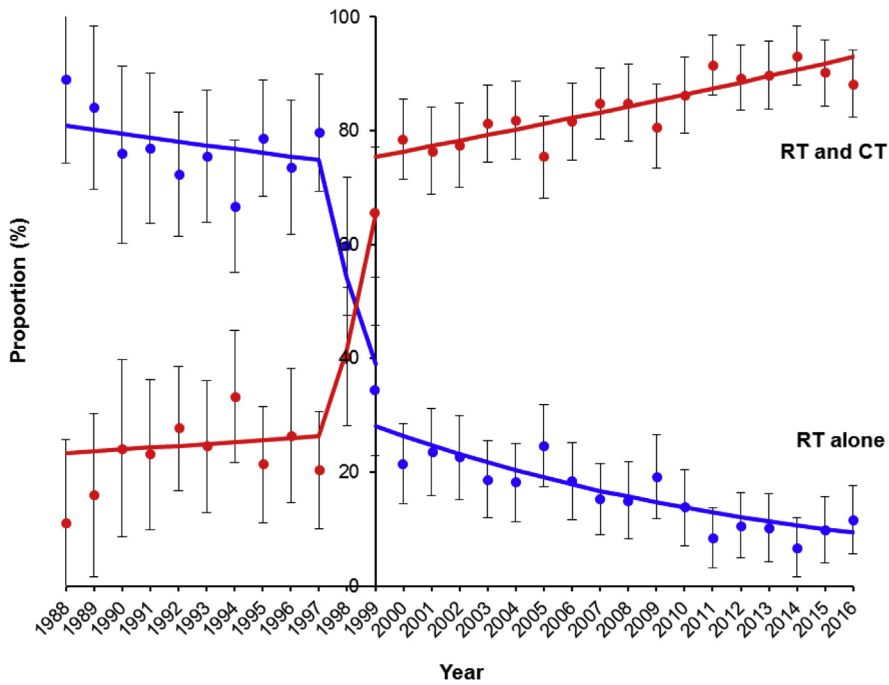

Dots represent observed value with 95%CI. Bars represent modeled value.

Abbreviations: RT and CT, concurrent chemo-radiotherapy; and RT alone, radiotherapy alone.

Matsuo et al. CCRT vs RT for node-positive early-stage cervical cancer. *Am J Obstet Gynecol* 2020.

**SUPPLEMENTAL FIGURE S2**  
**Subgroup analysis (PS-IPTW model)**

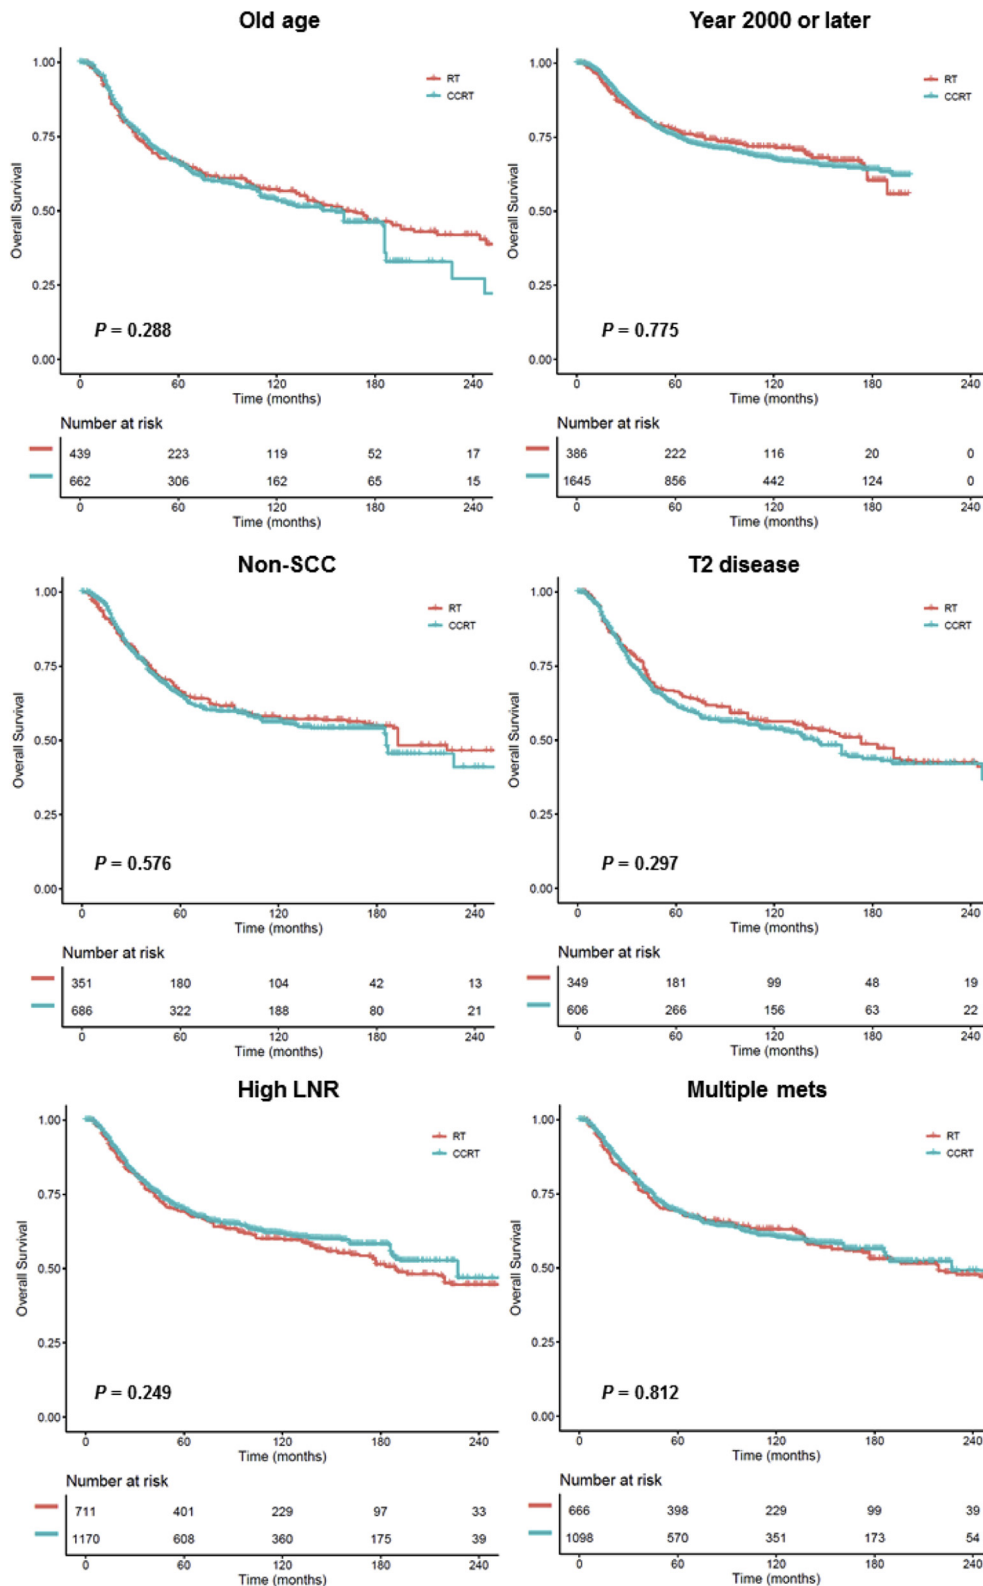

Cox proportional hazard regression model for *P*-value.

Abbreviations: RT, radiotherapy alone; and CCRT, concurrent chemo-radiotherapy

Matsuo et al. CCRT vs RT for node-positive early-stage cervical cancer. *Am J Obstet Gynecol* 2020.

**SUPPLEMENTAL FIGURE S3**  
**Population level outcome for 5-year overall survival rate**

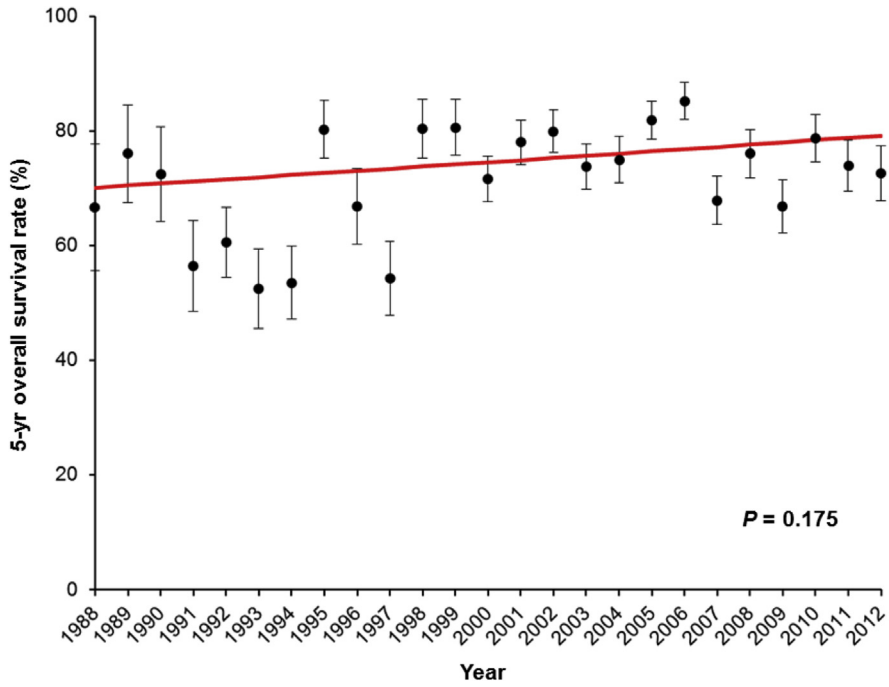

Dots represent observed value with 95%CI. Bars represent modeled value.

Matsuo et al. CCRT vs RT for node-positive early-stage cervical cancer. Am J Obstet Gynecol 2020.
